# Supplementary material for: Evaluation of the in vitro effects of the increasing inclusion levels of yeast β-glucan, a casein hydrolysate and its 5 kDa retentate on selected bacterial populations and strains commonly found in the gastrointestinal tract of pigs
Source: Royal Society of Chemistry journal article supplement (doi:10.1039/d0fo02269a), 2021-01-01
Supplement: d0fo02269a1.pdf [file d0fo02269a1.pdf]

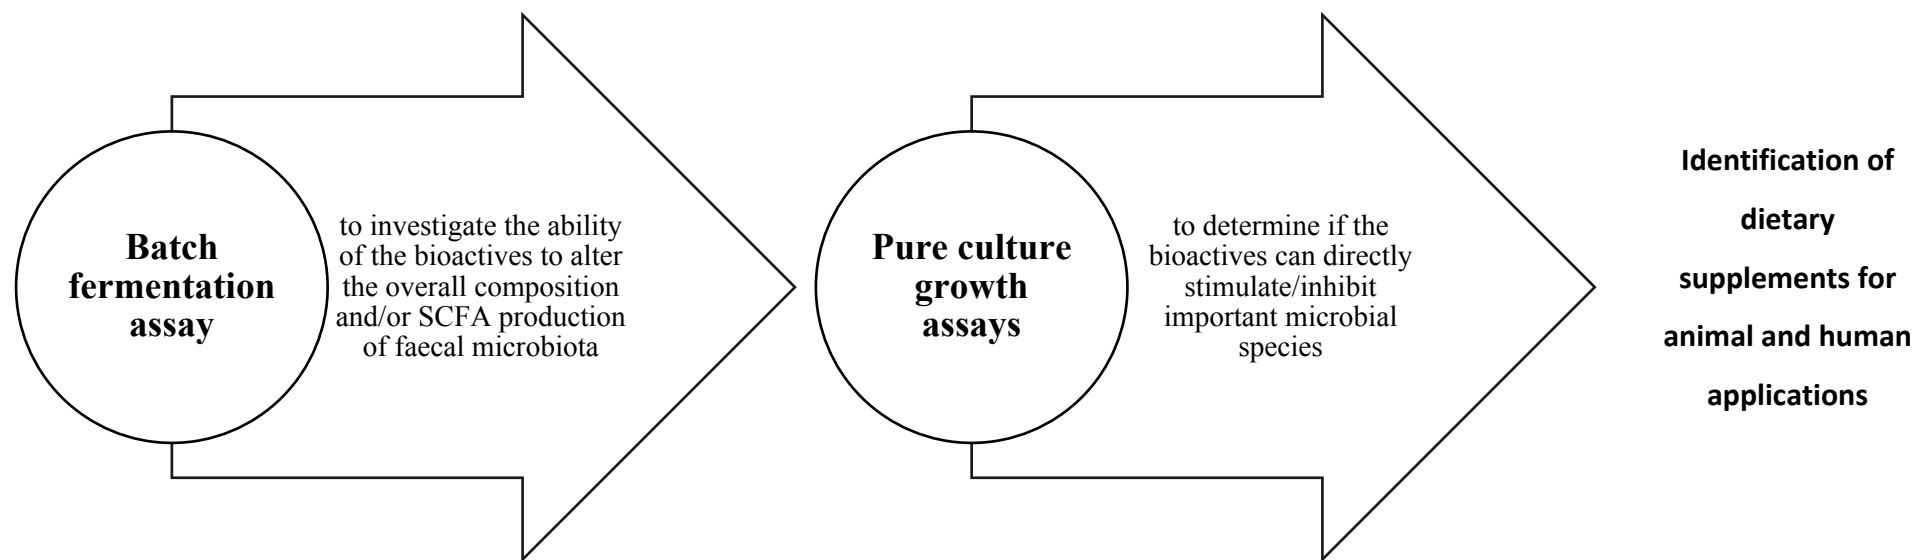

**Figure S1.** An outline of the experimental processes of this study.

**Table S1.** List of 16S rRNA regions incorporated into plasmids for the preparation of specific *Escherichia coli* clones used for the quantification of *Lactobacillus spp.*, total bacteria, *Enterobacteriaceae*, *Bifidobacterium spp.* and *Prevotella spp.*

| Bacterial group             | GenBank I.D.<br>(for purposes of alignment) | Region aligned | Description                                      | Primer Pairs              | T <sub>m</sub> (°C) | Amplicon length (bp) |
|-----------------------------|---------------------------------------------|----------------|--------------------------------------------------|---------------------------|---------------------|----------------------|
| <i>Lactobacillus spp.</i>   | CP017124.1                                  | 367650-        | Cloned Fragment and QPCR amplicon                | F: AGCAGTAGGGAATCTTCCA    | 54.5                | 341                  |
|                             |                                             | 367990         |                                                  | R: CACCGCTACACATGGAG      | 55.2                |                      |
| Total Bacteria              | CP033387.1                                  | 1195141-       | Cloned Fragment and QPCR amplicon                | F: GTGCCAGCMGCCGCGGTAA    | 64.2                | 291                  |
|                             |                                             | 1195413        |                                                  | R: GACTACCAGGGTATCTAAT    | 52.4                |                      |
| <i>Enterobacteriaceae</i>   | CP041955.1                                  | 483389-        | Clone Fragment and QPCR amplicon                 | F: ATGTTACAACCAAGCGTACA   | 54                  | 185                  |
|                             |                                             | 483554         |                                                  | R: TTACCYTGACGCTTAACTGC   | 56.3                |                      |
| <i>Bifidobacterium spp.</i> | CP016019.1                                  | 2328042-       | Cloned Fragment                                  | F: GCAATATCCCCACTGCTGC    | 59.3                | 586                  |
|                             |                                             | 2328627        |                                                  | R: GGTGTGGTGGTGGTTTGAGA   | 59.3                |                      |
|                             |                                             | 2328368-       | QPCR amplicon located within the cloned fragment | F: GCGTGCTTAACACATGCAAGTC | 60.3                | 125                  |
| 2328244                     | R: CACCCGTTTCCAGGAGCTATT                    | 59.8           |                                                  |                           |                     |                      |
| <i>Prevotella spp.</i>      | CP024730.1                                  | 246704-        | Cloned Fragment and QPCR amplicon                | F: CACRGTAACGATGGATGCC    | 58.3                | 514                  |
|                             |                                             | 246191         |                                                  | R: GGTCGGGTTGCAGACC       | 56.9                |                      |

bp, base pairs; T<sub>m</sub>, melting temperature.

**Table S2.** Health-associated characteristics of the bacterial strains used in the pure culture growth assays.

| Bacterial Strain               | Beneficial properties                                                                                                                                                                                                                                              |                                                                                                                                                                                      | Disease | References                    |
|--------------------------------|--------------------------------------------------------------------------------------------------------------------------------------------------------------------------------------------------------------------------------------------------------------------|--------------------------------------------------------------------------------------------------------------------------------------------------------------------------------------|---------|-------------------------------|
|                                | Pig                                                                                                                                                                                                                                                                | Human                                                                                                                                                                                |         |                               |
| <i>Lactobacillus plantarum</i> | Antimicrobial activity against enteropathogens<br>Increase of other lactobacilli and butyrate-producing clostridia<br>Reduction of <i>Enterobacteriaceae</i> and ETEC-induced diarrhea<br>Inhibition of $\beta$ -glycoronidase activity (carcinogenesis)           | Adhesive properties<br>Antibacterial activity against enteropathogens<br>IL-10 upregulation<br>Anti-tumour activity<br>Hypocholesteromic activity<br>Improved nutrient digestibility | N/A     | 63, 65, 68, 74, 87-89         |
| <i>Lactobacillus reuteri</i>   | Adhesive properties<br>Antimicrobial activity against enteropathogens<br>Increase of other lactobacilli<br>Reduction of <i>Enterobacteriaceae</i><br>Inhibition of $\beta$ -glycoronidase activity (carcinogenesis)<br>Increased adaptation to starch fermentation | Adhesive properties<br>Antimicrobial activity against enteropathogens<br>Inhibition of EPEC adhesion<br>Antiviral activity against Coxsackieviruses type A and Enterovirus 71        | N/A     | 63, 66, 71, 73, 74, 87, 90-93 |

|                                                       |                                          |                                                                                                                                                                                                                                                                                                                                            |                                                                                           |                        |
|-------------------------------------------------------|------------------------------------------|--------------------------------------------------------------------------------------------------------------------------------------------------------------------------------------------------------------------------------------------------------------------------------------------------------------------------------------------|-------------------------------------------------------------------------------------------|------------------------|
| <i>Bifidobacterium thermophilum</i>                   | Strong anti- <i>Brachyspira</i> activity | Adhesive properties<br>Inhibition of <i>Listeria monocytogenes</i> invasion in host cells<br><i>S.</i> Typhimurium inhibition and interference with virulence factors expression<br>Enhanced epithelial integrity during <i>S.</i> Typhimurium infection<br>Antiviral activity against Rotavirus and reduced disease severity and duration | N/A                                                                                       | 64, 66, 67, 70, 75, 94 |
| Enterotoxigenic <i>Escherichia coli</i> O149A+:K91:F4 | N/A                                      | N/A                                                                                                                                                                                                                                                                                                                                        | Pig: significant mortality, postweaning diarrhoea<br>Human: no reported disease in humans | 83, 95                 |
| <i>Salmonella</i> Typhimurium PT12                    | N/A                                      | N/A                                                                                                                                                                                                                                                                                                                                        | Pig: enterocolitis, septicaemia<br>Humans: gastroenteritis                                | 82, 96                 |

N/A, Not Applicable.
